# Supplementary material for: Development of severe skeletal defects in induced SHP-2-deficient adult mice: a model of skeletal malformation in humans with SHP-2 mutations
Source: PubMed Central journal article supplement — Dis Model Mech. 2011 Mar;4(2):228–39. doi: 10.1242/dmm.006130 (PMC3046097; doi:10.1242/dmm.006130), 2011-03
Supplement: supp_006130_DMM006130FigS1.pdf [file supp_006130_DMM006130FigS1.pdf]

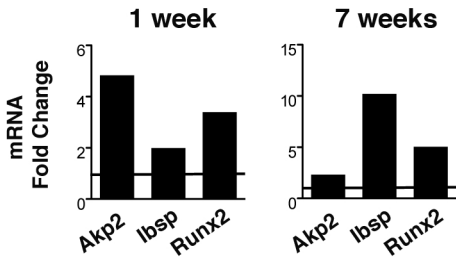

**Fig. S1. Expression of bone formation markers in induced SHP-2-deficient mice.** Littermate *shp-2* fl/fl *ert2-cre* and *shp-2* fl/fl control mice were injected with tamoxifen at 6 wk of age. Either 1 or 7 wk later, femora and tibia were obtained from mice and flushed free of bone marrow. RNA was prepared from crushed bones using Trizol reagent (Invitrogen) and expression of the indicated bone formation markers was assessed by quantitative RT-PCR using established primer/probe pairs (Applied Biosystems). Results for each marker were normalized to expression of levels of GAPDH in each sample and data are presented as fold change in mRNA expression in *shp-2* fl/fl *ert2-cre* bone compared to corresponding littermate *shp-2* fl/fl bone. Values greater than 1 indicate increased mRNA expression. Akp2, alkaline phosphatase 2; Ibsp, integrin-binding sialoprotein; Runx-2, Runt-related transcription factor-2.
